# Supplementary material for: Multiplexed fluidic plunger mechanism for the measurement of red blood cell deformability
Source: Royal Society of Chemistry journal article supplement (doi:10.1039/c4lc01100g), 2014-10-17
Supplement: c4lc01100g2.pdf [file c4lc01100g2.pdf]

1 **Supplementary materials for: Multiplexed fluidic plunger mechanism**  
2 **for the measurement of red blood cell deformability**

3 Marie-Eve Myrand-Lapierre<sup>a</sup>, Xiaoyan Deng<sup>a</sup>, Richard R. Ang<sup>a</sup>, Kerryn Matthews<sup>a</sup>, Aline T. Santos<sup>a</sup>, and  
4 Hongshen Ma<sup>a,b,c</sup>

5 *a Department of Mechanical Engineering, University of British Columbia, 2054-6250 Applied Science Lane,*  
6 *Vancouver, BC, Canada V6T 1Z4*

7 *b Department of Urologic Science, University of British Columbia, Vancouver, BC, Canada*

8 *c Vancouver Prostate Centre, Vancouver General Hospital, Vancouver, BC, Canada*

9

10 **Supplementary Video 1.** Video of the multiplexed RBC threshold pressure measurement process. The  
11 constrictions are initially loaded with RBCs. The applied pressure is slowly increased as part of a saw-  
12 tooth pressure waveform until all the RBCs transit through the constrictions. The video was sped up 4  
13 times.

14

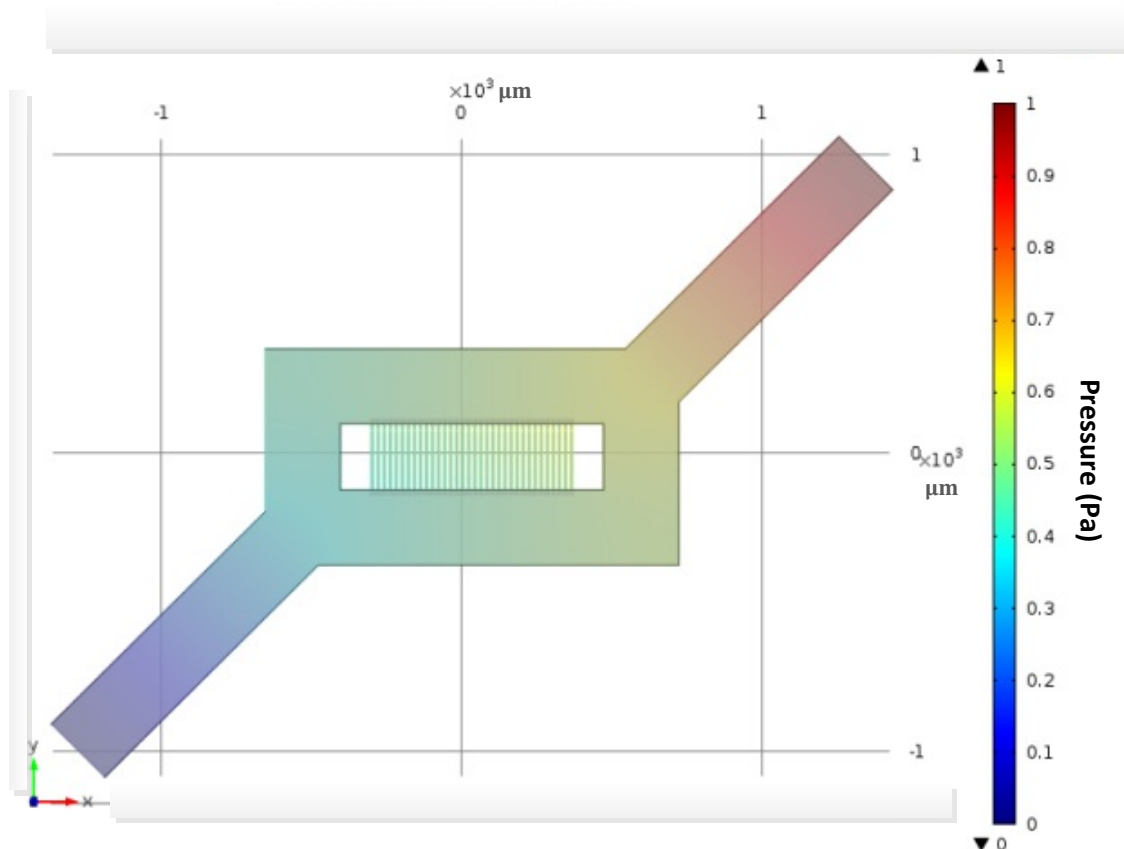

15

16 **Supplementary Figure 1.** Finite element model of pressure distribution in the bypass and loading  
17 microchannels created using COMSOL.

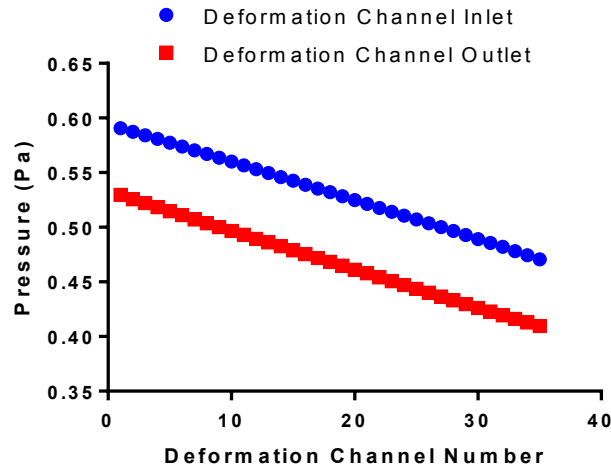

18

19 **Supplementary Figure 2.** Pressure at the inlet and outlet of the deformation microchannels sampled  
 20 from the finite element model. This analysis confirms that a consistent pressure difference is applied  
 21 across the parallel deformation microchannels.

22

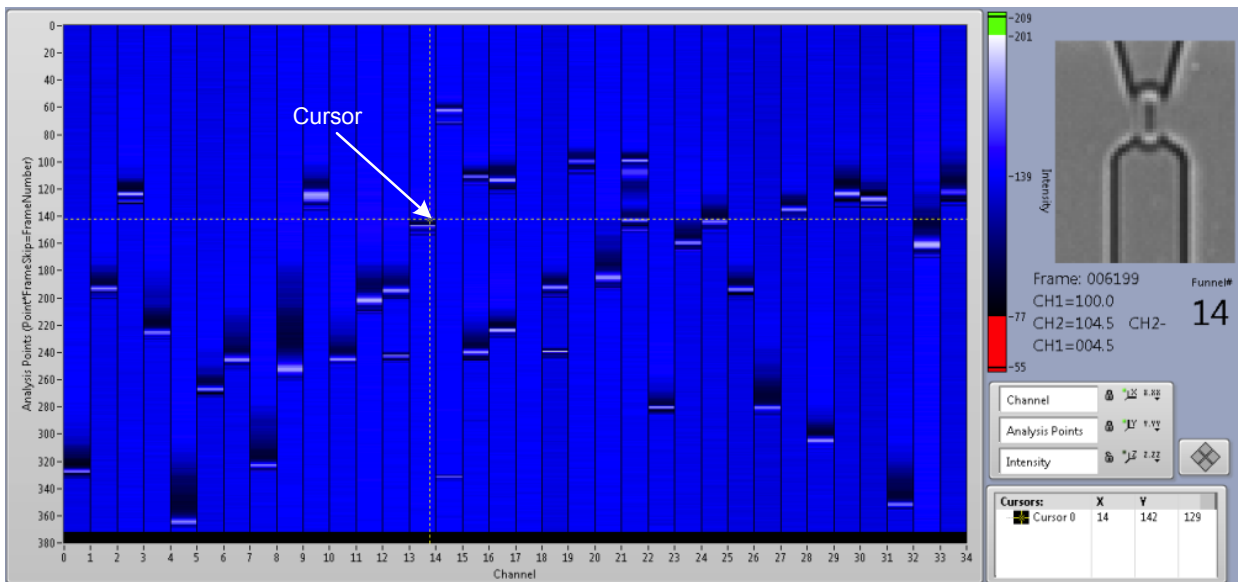

23

24

25 **Supplementary Figure 3.** Interface of the video analysis software developed to identify the threshold  
 26 pressures of each individual cell. Each deformation channel is represented in a column. The vertical axis  
 27 of the column represents time in seconds. The color in each strip in the column represents the average  
 28 intensity at the minimum point of the funnel. Cells transiting through the funnel constriction create an  
 29 anomaly in intensity. A dark strip indicates the beginning of a RBC transit event through a constriction,  
 30 and a white strip represents the full passage of a RBC through the constriction. The time-lapsed image of  
 31 the deformation of each individual RBC can be selected and viewed by hovering the cursor over each  
 32 color strip, enabling the corresponding applied pressure to be readout.
